# Supplementary material
Source: PubMed Central journal article supplement (PMC5094220)
Supplement: SD3.pdf [file SD3.pdf]

SUPPLEMENTAL TABLE 1

## Primer details

| Locus  | Primer name                                                 | Chromosomal no.           | Accession no. | Primer sequence                                                                                                                          |
|--------|-------------------------------------------------------------|---------------------------|---------------|------------------------------------------------------------------------------------------------------------------------------------------|
| TA81   | TA81-F<br>TA81-R<br>TA81-FM13                               | 5                         | AF010510      | GAAGAAATAAGGGAAGGT<br>TTTCACACAACACAGGATT<br><b>CACGACGTTGTAAAAACGACT</b> GGACAAATGGGAAAGGATA                                            |
| ARA2   | ARA2-F<br>ARA2-R<br>ARA2- FM13                              | 11                        | X17484        | GTACATATGAATCACAA<br>GCTTTGAGTATTATTAATA<br><b>CACGACGTTGTAAAAACGAC</b> GAAATAAACAAAGTATTGCT                                             |
| TA87   | TA87- F<br>TA87-R<br>TA87- FM13                             | 6                         | AF010571      | ATGGGTAAATGAGGTACA<br>ACATGTTTCATATTACTCAC<br><b>CACGACGTTGTAAAAACGACA</b> ATGGCAACACCATTCAAC                                            |
| TA40   | TA40-F<br>TA40-R<br>TA40-FM13<br>TA40-RI                    | 10                        | AF010542      | AAGGGATTGCTGCAAGGT<br>GAAATTGGCACCACCACA<br><b>CACGACGTTGTAAAAACGACA</b> AAGGGATTGCTGCAAGGT<br>CATCAATAAAATCACTACTA                      |
| TA42   | TA42-F<br>TA42-R<br>TA42-FM13                               | 5                         | AF010543      | ACAAAAGGGTGGTGATTCT<br>GTATTACTACTACTAAAG<br><b>CACGACGTTGTAAAAACGACT</b> AGAAACAGGAATGATACG                                             |
| TA1    | TA1-F<br>TA1-R<br>TA1-FM13                                  | 6                         | AF010507      | CTACATGCCTAATGAGCA<br>TTTTATCTTCATCCCCAC<br><b>CACGACGTTGTAAAAACGAC</b> CCCGTCATAAGTGCAGAGC                                              |
| TA109  | TA109-F<br>TA109-R<br>TA109-FM13                            | 6                         | AF010508      | TAGGGAACATCATAAGGAT<br>CCTATACCAAACATGCTAAA<br><b>CACGACGTTGTAAAAACGAC</b> GTTAAATCAGGACAACAT                                            |
| PFG377 | PFG377-F<br>PFG377-OR<br>PFG377-FM13<br>PFG377-R<br>M13FHEX | 12                        | L04161        | GATCTCAACGGAAATTAT<br>TTATCCCTACGATTAACA<br><b>CACGACGTTGTAAAAACGAC</b> GATCTCAACGGAAATTAT<br>TTATGTTGGTACCGTGTA<br>CACGACGTTGTAAAAACGAC |
|        |                                                             | Universal reporter primer |               |                                                                                                                                          |

Sequence in **bold** is M13 tag.

SUPPLEMENTAL TABLE 2  
Microsatellite genotype profiles for 188 isolates

| S. No. | Sample ID | Marker loci |        |     |      |      |      |      |       |
|--------|-----------|-------------|--------|-----|------|------|------|------|-------|
|        |           | ARA2        | PFG377 | TA1 | TA40 | TA42 | TA81 | TA87 | TA109 |
| 1      | K5        | 78          | 105    | 197 | 248  | 204  | 138  | 120  | 191   |
| 2      | K1        | 75          | 90     | 197 | 209  | 204  | 108  | 123  | 185   |
| 3      | K105      | 84          | 114    | 179 | 227  | 210  | 135  | 126  | 191   |
| 4      | K106      | 87          | 114    | 188 | 233  | 228  | 135  | 117  | 194   |
| 5      | K10       | 78          | 114    | 179 | 224  | 201  | 144  | 117  | 179   |
| 6      | K111      | 75          | 90     | 185 | 203  | 204  | 135  | 114  | 215   |
| 7      | K116      | 75          | 96     | 179 | 230  | 207  | 165  | 126  | 215   |
| 8      | K13       | 75          | 81     | 197 | 248  | 207  | 150  | 117  | 215   |
| 9      | K130      | 75          | 81     | 179 | 218  | 204  | 135  | 114  | 215   |
| 10     | K15       | 99          | 96     | 191 | 233  | 204  | 138  | 123  | 179   |
| 11     | K17       | 75          | 81     | 179 | 203  | 207  | 144  | 114  | 212   |
| 12     | K18       | 87          | 87     | 152 | 233  | 204  | 144  | 108  | 179   |
| 13     | K19       | 75          | 81     | 191 | 206  | 219  | 138  | 129  | 215   |
| 14     | K2        | 72          | 87     | 182 | 248  | 207  | 105  | 117  | 215   |
| 15     | K20       | 75          | 81     | 191 | 227  | 201  | 138  | 114  | 215   |
| 16     | K27       | 75          | 96     | 191 | 230  | 204  | 111  | 114  | 215   |
| 17     | K28       | 75          | 87     | 179 | 236  | 204  | 141  | 111  | 215   |
| 18     | K3        | 75          | 81     | 197 | 248  | 207  | 141  | 117  | 215   |
| 19     | K30       | 75          | 87     | 179 | 227  | 201  | 102  | 111  | 215   |
| 20     | K33       | 75          | 117    | 179 | 224  | 210  | 141  | 114  | 215   |
| 21     | K36       | 75          | 81     | 227 | 224  | 201  | 141  | 117  | 215   |
| 22     | K39       | 75          | 87     | 227 | 242  | 201  | 135  | 114  | 215   |
| 23     | K40       | 75          | 114    | 179 | 206  | 219  | 111  | 129  | 191   |
| 24     | K41       | 75          | 87     | 179 | 206  | 219  | 165  | 114  | 215   |
| 25     | K42       | 75          | 81     | 191 | 230  | 204  | 165  | 114  | 215   |
| 26     | K44       | 87          | 102    | 179 | 230  | 204  | 108  | 114  | 215   |
| 27     | K46       | 75          | 81     | 200 | 239  | 204  | 111  | 114  | 215   |
| 28     | K49       | 75          | 90     | 191 | 239  | 204  | 141  | 114  | 227   |
| 29     | K52       | 75          | 84     | 140 | 227  | 204  | 102  | 114  | 215   |
| 30     | K6        | 75          | 90     | 200 | 218  | 207  | 153  | 117  | 215   |
| 31     | K60       | 99          | 105    | 227 | 209  | 180  | 135  | 114  | 206   |
| 32     | K9        | 84          | 93     | 188 | 230  | 204  | 135  | 120  | 179   |
| 33     | K90       | 75          | 90     | 200 | 227  | 204  | 132  | 114  | 215   |
| 34     | K92       | 84          | 114    | 194 | 239  | 204  | 144  | 117  | 188   |
| 35     | K94       | 75          | 87     | 185 | 203  | 204  | 132  | 111  | 212   |
| 36     | MC120     | 93          | 105    | 188 | 233  | 204  | 153  | 111  | 179   |
| 37     | MC16      | 87          | 120    | 182 | 233  | 207  | 138  | 123  | 191   |
| 38     | MC34      | 90          | 105    | 188 | 239  | 204  | 165  | 123  | 182   |
| 39     | MC54      | 84          | 114    | 188 | 236  | 204  | 138  | 120  | 179   |
| 40     | MC56      | 84          | 105    | 188 | 242  | 204  | 144  | 123  | 185   |
| 41     | MC78      | 87          | 105    | 179 | 230  | 204  | 147  | 123  | 200   |
| 42     | MC90      | 84          | 105    | 185 | 239  | 204  | 135  | 114  | 203   |
| 43     | MC1       | 93          | 114    | 179 | 230  | 204  | 144  | 120  | 191   |
| 44     | MC101     | 75          | 111    | 185 | 203  | 201  | 135  | 123  | 215   |
| 45     | MC105     | 75          | 111    | 173 | 203  | 201  | 126  | 114  | 212   |
| 46     | MC108     | 75          | 81     | 194 | 236  | 204  | 141  | 123  | 215   |
| 47     | MC11      | 87          | 93     | 179 | 230  | 210  | 138  | 123  | 194   |
| 48     | MC117     | 75          | 111    | 191 | 224  | 204  | 141  | 114  | 182   |
| 49     | MC123     | 75          | 111    | 191 | 230  | 207  | 141  | 117  | 182   |
| 50     | MC124     | 75          | 111    | 191 | 233  | 204  | 141  | 117  | 215   |
| 51     | MC125     | 75          | 111    | 191 | 212  | 204  | 102  | 114  | 212   |
| 52     | MC127     | 75          | 93     | 191 | 233  | 204  | 138  | 129  | 215   |
| 53     | MC129     | 84          | 93     | 179 | 236  | 204  | 138  | 126  | 215   |
| 54     | MC13      | 87          | 105    | 185 | 236  | 204  | 135  | 123  | 179   |
| 55     | MC133     | 75          | 117    | 152 | 233  | 198  | 135  | 114  | 215   |
| 56     | MC134     | 75          | 114    | 179 | 215  | 201  | 141  | 114  | 215   |
| 57     | MC141     | 78          | 114    | 182 | 230  | 204  | 141  | 114  | 194   |
| 58     | MC145     | 84          | 93     | 185 | 233  | 225  | 147  | 135  | 182   |
| 59     | MC15      | 84          | 117    | 179 | 245  | 204  | 147  | 132  | 182   |
| 60     | MC21      | 93          | 114    | 182 | 233  | 210  | 144  | 123  | 179   |
| 61     | MC212     | 87          | 117    | 185 | 233  | 222  | 144  | 120  | 194   |
| 62     | MC32      | 87          | 114    | 182 | 236  | 204  | 141  | 123  | 194   |
| 63     | MC4       | 84          | 114    | 194 | 200  | 162  | 141  | 123  | 191   |
| 64     | MC84      | 87          | 114    | 191 | 233  | 228  | 144  | 114  | 194   |
| 65     | MC91      | 75          | 93     | 194 | 239  | 204  | 102  | 117  | 215   |
| 66     | MC93      | 87          | 111    | 197 | 230  | 219  | 135  | 114  | 182   |
| 67     | MC98      | 75          | 111    | 179 | 206  | 204  | 141  | 126  | 215   |
| 68     | MI161     | 84          | 117    | 182 | 224  | 204  | 147  | 123  | 179   |

(continued)

SUPPLEMENTAL TABLE 2  
Continued

| S. No. | Sample ID | Marker loci |        |     |      |      |      |      |       |
|--------|-----------|-------------|--------|-----|------|------|------|------|-------|
|        |           | ARA2        | PFG377 | TA1 | TA40 | TA42 | TA81 | TA87 | TA109 |
| 69     | MI20      | 84          | 144    | 191 | 236  | 207  | 144  | 114  | 185   |
| 70     | MI200     | 93          | 147    | 194 | 212  | 198  | 135  | 123  | 179   |
| 71     | MI203     | 84          | 117    | 182 | 212  | 207  | 135  | 123  | 179   |
| 72     | MI37      | 87          | 114    | 185 | 236  | 204  | 135  | 120  | 179   |
| 73     | MI198     | 75          | 93     | 197 | 239  | 204  | 150  | 114  | 215   |
| 74     | MI199     | 75          | 90     | 197 | 218  | 207  | 144  | 114  | 215   |
| 75     | MI201     | 93          | 114    | 197 | 230  | 207  | 144  | 117  | 179   |
| 76     | MI202     | 75          | 117    | 179 | 203  | 204  | 147  | 117  | 215   |
| 77     | MI117     | 81          | 114    | 203 | 236  | 201  | 144  | 120  | 176   |
| 78     | MI162     | 84          | 105    | 179 | 245  | 204  | 135  | 120  | 179   |
| 79     | MI23      | 84          | 84     | 185 | 233  | 204  | 147  | 129  | 182   |
| 80     | MI38      | 87          | 117    | 203 | 215  | 219  | 144  | 117  | 185   |
| 81     | MI41      | 78          | 105    | 179 | 230  | 204  | 135  | 111  | 197   |
| 82     | MI52      | 90          | 114    | 173 | 224  | 204  | 141  | 114  | 179   |
| 83     | MI54      | 87          | 117    | 200 | 227  | 204  | 144  | 117  | 179   |
| 84     | MI57      | 84          | 114    | 188 | 236  | 204  | 138  | 120  | 191   |
| 85     | MI74      | 84          | 114    | 182 | 215  | 204  | 138  | 114  | 182   |
| 86     | N213      | 84          | 147    | 212 | 212  | 180  | 147  | 114  | 179   |
| 87     | N92       | 84          | 144    | 182 | 206  | 207  | 138  | 114  | 194   |
| 88     | N156      | 75          | 144    | 188 | 236  | 213  | 132  | 111  | 185   |
| 89     | N157      | 87          | 114    | 164 | 212  | 219  | 147  | 108  | 182   |
| 90     | N177      | 87          | 147    | 164 | 230  | 204  | 138  | 120  | 191   |
| 91     | N25       | 84          | 84     | 164 | 233  | 180  | 126  | 114  | 191   |
| 92     | N29       | 87          | 129    | 164 | 233  | 204  | 165  | 120  | 191   |
| 93     | N42       | 87          | 129    | 164 | 230  | 207  | 147  | 114  | 182   |
| 94     | N43       | 87          | 117    | 188 | 218  | 204  | 165  | 123  | 215   |
| 95     | N50       | 90          | 129    | 164 | 230  | 165  | 138  | 135  | 215   |
| 96     | N54       | 96          | 90     | 179 | 230  | 219  | 132  | 126  | 203   |
| 97     | N55       | 87          | 105    | 191 | 203  | 207  | 132  | 123  | 215   |
| 98     | N62       | 87          | 90     | 182 | 203  | 213  | 126  | 123  | 215   |
| 99     | N73       | 72          | 93     | 179 | 233  | 201  | 144  | 117  | 215   |
| 100    | N84       | 87          | 87     | 164 | 212  | 182  | 135  | 126  | 191   |
| 101    | N90       | 87          | 81     | 212 | 233  | 201  | 177  | 123  | 179   |
| 102    | N95       | 78          | 114    | 209 | 230  | 204  | 135  | 114  | 191   |
| 103    | T101      | 78          | 114    | 188 | 215  | 219  | 138  | 120  | 191   |
| 104    | T114      | 87          | 105    | 188 | 227  | 204  | 141  | 126  | 194   |
| 105    | T122      | 84          | 129    | 188 | 236  | 207  | 147  | 120  | 185   |
| 106    | T128      | 84          | 105    | 191 | 233  | 204  | 138  | 117  | 182   |
| 107    | T150      | 84          | 114    | 179 | 239  | 207  | 135  | 132  | 182   |
| 108    | T191      | 84          | 114    | 164 | 224  | 207  | 141  | 117  | 182   |
| 109    | T197      | 87          | 114    | 164 | 212  | 204  | 132  | 105  | 203   |
| 110    | T209      | 78          | 114    | 179 | 230  | 201  | 144  | 117  | 215   |
| 111    | T241      | 84          | 84     | 203 | 209  | 204  | 135  | 126  | 203   |
| 112    | T41       | 87          | 132    | 185 | 212  | 165  | 144  | 120  | 179   |
| 113    | T115      | 84          | 117    | 179 | 233  | 204  | 147  | 129  | 182   |
| 114    | T119      | 75          | 87     | 179 | 218  | 210  | 141  | 129  | 179   |
| 115    | T126      | 75          | 90     | 185 | 230  | 207  | 138  | 117  | 179   |
| 116    | T137      | 75          | 96     | 188 | 218  | 207  | 114  | 117  | 215   |
| 117    | T142      | 87          | 96     | 212 | 218  | 204  | 144  | 111  | 215   |
| 118    | T153      | 93          | 81     | 179 | 218  | 204  | 99   | 120  | 215   |
| 119    | T16       | 75          | 84     | 179 | 218  | 201  | 144  | 114  | 209   |
| 120    | T166      | 75          | 90     | 194 | 227  | 201  | 108  | 120  | 212   |
| 121    | T169      | 75          | 90     | 185 | 239  | 207  | 102  | 117  | 182   |
| 122    | T172      | 75          | 141    | 200 | 206  | 207  | 99   | 117  | 215   |
| 123    | T176      | 75          | 96     | 197 | 203  | 207  | 165  | 102  | 197   |
| 124    | T185      | 75          | 141    | 197 | 236  | 204  | 150  | 114  | 215   |
| 125    | T196      | 75          | 90     | 197 | 230  | 210  | 165  | 114  | 215   |
| 126    | T204      | 75          | 81     | 194 | 218  | 210  | 147  | 114  | 215   |
| 127    | T208      | 87          | 117    | 179 | 248  | 204  | 147  | 123  | 194   |
| 128    | T247      | 75          | 117    | 197 | 230  | 204  | 141  | 123  | 215   |
| 129    | T26       | 75          | 93     | 194 | 218  | 207  | 165  | 129  | 215   |
| 130    | T30       | 72          | 81     | 194 | 230  | 207  | 117  | 126  | 215   |
| 131    | T33       | 75          | 114    | 185 | 218  | 204  | 144  | 114  | 215   |
| 132    | T64       | 75          | 111    | 185 | 218  | 204  | 144  | 114  | 215   |
| 133    | T68       | 96          | 111    | 185 | 218  | 204  | 102  | 123  | 218   |
| 134    | T72       | 96          | 111    | 209 | 239  | 204  | 141  | 123  | 218   |
| 135    | T73       | 75          | 93     | 197 | 218  | 204  | 150  | 120  | 215   |
| 136    | T77       | 75          | 93     | 194 | 218  | 204  | 147  | 114  | 215   |

(continued)

SUPPLEMENTAL TABLE 2

Continued

| S. No. | Sample ID | Marker loci |        |     |      |      |      |      |       |
|--------|-----------|-------------|--------|-----|------|------|------|------|-------|
|        |           | ARA2        | PFG377 | TA1 | TA40 | TA42 | TA81 | TA87 | TA109 |
| 137    | T81       | 75          | 90     | 197 | 218  | 204  | 150  | 114  | 215   |
| 138    | T9        | 75          | 81     | 179 | 218  | 207  | 144  | 114  | 212   |
| 139    | U10       | 84          | 84     | 185 | 224  | 210  | 135  | 126  | 194   |
| 140    | U101      | 81          | 105    | 179 | 212  | 204  | 144  | 123  | 182   |
| 141    | U106      | 87          | 117    | 200 | 230  | 204  | 132  | 114  | 182   |
| 142    | U107      | 78          | 105    | 194 | 233  | 204  | 138  | 129  | 179   |
| 143    | U110      | 99          | 84     | 185 | 209  | 198  | 147  | 114  | 182   |
| 144    | U117      | 72          | 90     | 179 | 203  | 198  | 141  | 117  | 215   |
| 145    | U118      | 75          | 90     | 179 | 218  | 204  | 135  | 117  | 215   |
| 146    | U120      | 87          | 90     | 185 | 224  | 207  | 135  | 117  | 215   |
| 147    | U123      | 90          | 93     | 203 | 218  | 204  | 135  | 117  | 179   |
| 148    | U125      | 87          | 93     | 179 | 227  | 204  | 132  | 117  | 203   |
| 149    | U126      | 87          | 93     | 188 | 230  | 204  | 135  | 117  | 182   |
| 150    | U129      | 72          | 90     | 188 | 230  | 204  | 129  | 114  | 188   |
| 151    | U130      | 90          | 84     | 146 | 227  | 204  | 144  | 111  | 182   |
| 152    | U15       | 78          | 105    | 185 | 224  | 204  | 135  | 114  | 185   |
| 153    | U16       | 84          | 105    | 179 | 200  | 207  | 144  | 120  | 179   |
| 154    | U168      | 84          | 96     | 191 | 227  | 204  | 138  | 126  | 179   |
| 155    | U17       | 90          | 105    | 188 | 224  | 204  | 144  | 114  | 176   |
| 156    | U171      | 84          | 93     | 182 | 227  | 204  | 141  | 114  | 191   |
| 157    | U176      | 87          | 105    | 200 | 233  | 207  | 144  | 114  | 176   |
| 158    | U19       | 102         | 105    | 185 | 233  | 204  | 138  | 108  | 185   |
| 159    | U207      | 84          | 87     | 185 | 221  | 204  | 147  | 114  | 182   |
| 160    | U21       | 84          | 105    | 179 | 212  | 204  | 138  | 114  | 176   |
| 161    | U218      | 78          | 105    | 197 | 230  | 204  | 135  | 126  | 182   |
| 162    | U23       | 90          | 105    | 176 | 233  | 204  | 135  | 117  | 176   |
| 163    | U233      | 90          | 87     | 188 | 230  | 204  | 126  | 123  | 179   |
| 164    | U237      | 84          | 84     | 194 | 212  | 204  | 135  | 114  | 215   |
| 165    | U24       | 93          | 84     | 197 | 212  | 222  | 132  | 114  | 203   |
| 166    | U244      | 84          | 129    | 206 | 209  | 204  | 162  | 114  | 179   |
| 167    | U246      | 84          | 114    | 218 | 209  | 198  | 135  | 114  | 185   |
| 168    | U27       | 84          | 105    | 188 | 239  | 204  | 165  | 114  | 179   |
| 169    | U31       | 84          | 114    | 191 | 206  | 204  | 135  | 123  | 194   |
| 170    | U33       | 96          | 84     | 188 | 248  | 219  | 141  | 114  | 194   |
| 171    | U34       | 84          | 117    | 185 | 200  | 201  | 135  | 117  | 191   |
| 172    | U4        | 87          | 105    | 188 | 215  | 210  | 135  | 117  | 215   |
| 173    | U41       | 78          | 105    | 188 | 230  | 219  | 135  | 117  | 179   |
| 174    | U46       | 84          | 117    | 179 | 200  | 204  | 135  | 120  | 185   |
| 175    | U49       | 96          | 105    | 182 | 209  | 204  | 144  | 111  | 179   |
| 176    | U50       | 87          | 105    | 149 | 248  | 204  | 159  | 117  | 182   |
| 177    | U53       | 84          | 105    | 179 | 233  | 204  | 147  | 114  | 179   |
| 178    | U55       | 93          | 105    | 185 | 230  | 204  | 144  | 120  | 185   |
| 179    | U57       | 93          | 105    | 179 | 233  | 219  | 141  | 123  | 182   |
| 180    | U61       | 90          | 114    | 182 | 230  | 219  | 138  | 126  | 191   |
| 181    | U64       | 87          | 87     | 185 | 236  | 204  | 144  | 114  | 179   |
| 182    | U65       | 84          | 87     | 176 | 227  | 204  | 144  | 120  | 179   |
| 183    | U70       | 78          | 96     | 188 | 212  | 204  | 135  | 123  | 194   |
| 184    | U74       | 87          | 105    | 179 | 230  | 204  | 138  | 114  | 179   |
| 185    | U79       | 81          | 84     | 185 | 206  | 204  | 132  | 114  | 194   |
| 186    | U86       | 81          | 105    | 215 | 209  | 204  | 135  | 114  | 194   |
| 187    | U94       | 81          | 105    | 197 | 215  | 204  | 162  | 114  | 194   |
| 188    | U95       | 81          | 105    | 179 | 218  | 204  | 135  | 123  | 194   |

SUPPLEMENTAL TABLE 3  
Allelic frequencies at eight microsatellite loci

| Locus  | Allele | Kibuogi | Mfangano | Ngodhe | Takawiri | Ungoye |
|--------|--------|---------|----------|--------|----------|--------|
| ARA2   | 102    | 0.000   | 0.000    | 0.000  | 0.000    | 0.020  |
|        | 72     | 0.029   | 0.000    | 0.059  | 0.028    | 0.040  |
|        | 75     | 0.686   | 0.300    | 0.059  | 0.528    | 0.020  |
|        | 78     | 0.057   | 0.040    | 0.059  | 0.056    | 0.100  |
|        | 81     | 0.000   | 0.020    | 0.000  | 0.000    | 0.100  |
|        | 84     | 0.086   | 0.280    | 0.176  | 0.167    | 0.300  |
|        | 87     | 0.086   | 0.220    | 0.529  | 0.139    | 0.180  |
|        | 90     | 0.000   | 0.040    | 0.059  | 0.000    | 0.120  |
|        | 93     | 0.000   | 0.100    | 0.000  | 0.028    | 0.060  |
|        | 96     | 0.000   | 0.000    | 0.059  | 0.056    | 0.040  |
| PFG377 | 99     | 0.057   | 0.000    | 0.000  | 0.000    | 0.020  |
|        | 102    | 0.029   | 0.000    | 0.000  | 0.000    | 0.000  |
|        | 105    | 0.057   | 0.160    | 0.059  | 0.056    | 0.440  |
|        | 111    | 0.000   | 0.160    | 0.000  | 0.083    | 0.000  |
|        | 114    | 0.143   | 0.280    | 0.118  | 0.167    | 0.060  |
|        | 117    | 0.029   | 0.160    | 0.059  | 0.083    | 0.060  |
|        | 120    | 0.000   | 0.020    | 0.000  | 0.000    | 0.000  |
|        | 129    | 0.000   | 0.000    | 0.176  | 0.028    | 0.020  |
|        | 132    | 0.000   | 0.000    | 0.000  | 0.028    | 0.000  |
|        | 141    | 0.000   | 0.000    | 0.000  | 0.056    | 0.000  |
| TA1    | 144    | 0.000   | 0.020    | 0.118  | 0.000    | 0.000  |
|        | 147    | 0.000   | 0.020    | 0.118  | 0.000    | 0.000  |
|        | 81     | 0.257   | 0.020    | 0.059  | 0.111    | 0.000  |
|        | 84     | 0.029   | 0.020    | 0.059  | 0.056    | 0.140  |
|        | 87     | 0.200   | 0.000    | 0.059  | 0.028    | 0.080  |
|        | 90     | 0.143   | 0.020    | 0.118  | 0.139    | 0.080  |
|        | 93     | 0.029   | 0.120    | 0.059  | 0.083    | 0.080  |
|        | 96     | 0.086   | 0.000    | 0.000  | 0.083    | 0.040  |
|        | 140    | 0.029   | 0.000    | 0.000  | 0.000    | 0.000  |
|        | 146    | 0.000   | 0.000    | 0.000  | 0.000    | 0.020  |
| TA40   | 149    | 0.000   | 0.000    | 0.000  | 0.000    | 0.020  |
|        | 151    | 0.029   | 0.000    | 0.000  | 0.000    | 0.000  |
|        | 152    | 0.000   | 0.020    | 0.000  | 0.000    | 0.000  |
|        | 164    | 0.000   | 0.000    | 0.412  | 0.056    | 0.000  |
|        | 173    | 0.000   | 0.040    | 0.000  | 0.000    | 0.000  |
|        | 176    | 0.000   | 0.000    | 0.000  | 0.000    | 0.040  |
|        | 179    | 0.314   | 0.200    | 0.118  | 0.222    | 0.220  |
|        | 182    | 0.029   | 0.140    | 0.118  | 0.000    | 0.060  |
|        | 185    | 0.057   | 0.140    | 0.000  | 0.167    | 0.200  |
|        | 188    | 0.057   | 0.100    | 0.118  | 0.111    | 0.180  |
|        | 191    | 0.171   | 0.140    | 0.059  | 0.028    | 0.040  |
|        | 194    | 0.029   | 0.080    | 0.000  | 0.139    | 0.040  |
|        | 197    | 0.114   | 0.080    | 0.000  | 0.167    | 0.060  |
|        | 200    | 0.086   | 0.020    | 0.000  | 0.028    | 0.040  |
|        | 203    | 0.000   | 0.040    | 0.000  | 0.028    | 0.020  |
|        | 206    | 0.000   | 0.000    | 0.000  | 0.000    | 0.020  |
|        | 209    | 0.000   | 0.000    | 0.059  | 0.028    | 0.000  |
|        | 212    | 0.000   | 0.000    | 0.118  | 0.028    | 0.000  |
|        | 215    | 0.000   | 0.000    | 0.000  | 0.000    | 0.020  |
|        | 218    | 0.000   | 0.000    | 0.000  | 0.000    | 0.020  |
|        | 227    | 0.086   | 0.000    | 0.000  | 0.000    | 0.000  |
|        | 200    | 0.000   | 0.020    | 0.000  | 0.000    | 0.060  |
|        | 203    | 0.114   | 0.060    | 0.118  | 0.028    | 0.020  |
|        | 206    | 0.086   | 0.020    | 0.059  | 0.028    | 0.060  |
|        | 209    | 0.057   | 0.000    | 0.000  | 0.028    | 0.100  |
|        | 212    | 0.000   | 0.060    | 0.176  | 0.056    | 0.100  |
|        | 215    | 0.000   | 0.060    | 0.000  | 0.028    | 0.040  |
|        | 218    | 0.057   | 0.020    | 0.059  | 0.389    | 0.060  |
|        | 221    | 0.000   | 0.000    | 0.000  | 0.000    | 0.020  |
|        | 224    | 0.086   | 0.040    | 0.000  | 0.000    | 0.100  |
|        | 227    | 0.143   | 0.020    | 0.000  | 0.056    | 0.100  |
|        | 230    | 0.143   | 0.160    | 0.294  | 0.139    | 0.180  |
|        | 233    | 0.086   | 0.220    | 0.235  | 0.056    | 0.100  |
|        | 236    | 0.029   | 0.180    | 0.059  | 0.056    | 0.000  |
|        | 239    | 0.086   | 0.100    | 0.000  | 0.111    | 0.020  |
|        | 242    | 0.029   | 0.020    | 0.000  | 0.000    | 0.000  |
|        | 245    | 0.000   | 0.020    | 0.000  | 0.000    | 0.000  |
|        | 248    | 0.086   | 0.000    | 0.000  | 0.028    | 0.040  |

(continued)

SUPPLEMENTAL TABLE 3

Continued

| Locus | Allele | Kibuogi | Mfangano | Ngodhe | Takawiri | Ungoye |
|-------|--------|---------|----------|--------|----------|--------|
| TA42  | 162    | 0.000   | 0.020    | 0.000  | 0.000    | 0.000  |
|       | 165    | 0.000   | 0.000    | 0.059  | 0.028    | 0.000  |
|       | 180    | 0.029   | 0.000    | 0.059  | 0.000    | 0.000  |
|       | 183    | 0.000   | 0.000    | 0.118  | 0.000    | 0.000  |
|       | 198    | 0.000   | 0.040    | 0.000  | 0.000    | 0.060  |
|       | 201    | 0.143   | 0.100    | 0.118  | 0.083    | 0.040  |
|       | 204    | 0.486   | 0.560    | 0.235  | 0.472    | 0.680  |
|       | 207    | 0.171   | 0.120    | 0.176  | 0.306    | 0.060  |
|       | 210    | 0.057   | 0.060    | 0.000  | 0.083    | 0.040  |
|       | 213    | 0.000   | 0.000    | 0.118  | 0.000    | 0.000  |
|       | 219    | 0.086   | 0.040    | 0.118  | 0.028    | 0.100  |
|       | 222    | 0.000   | 0.020    | 0.000  | 0.000    | 0.020  |
|       | 225    | 0.000   | 0.020    | 0.000  | 0.000    | 0.000  |
|       | 228    | 0.029   | 0.020    | 0.000  | 0.000    | 0.000  |
|       | TA81   | 102     | 0.057    | 0.040  | 0.000    | 0.056  |
| 105   |        | 0.029   | 0.000    | 0.000  | 0.000    | 0.000  |
| 108   |        | 0.057   | 0.000    | 0.000  | 0.028    | 0.000  |
| 111   |        | 0.086   | 0.000    | 0.000  | 0.000    | 0.000  |
| 114   |        | 0.000   | 0.000    | 0.000  | 0.028    | 0.000  |
| 126   |        | 0.000   | 0.020    | 0.118  | 0.000    | 0.020  |
| 129   |        | 0.000   | 0.000    | 0.000  | 0.000    | 0.020  |
| 132   |        | 0.057   | 0.000    | 0.176  | 0.028    | 0.080  |
| 135   |        | 0.200   | 0.200    | 0.118  | 0.056    | 0.360  |
| 138   |        | 0.114   | 0.140    | 0.176  | 0.083    | 0.120  |
| 141   |        | 0.143   | 0.200    | 0.000  | 0.139    | 0.080  |
| 144   |        | 0.114   | 0.220    | 0.059  | 0.194    | 0.180  |
| 147   |        | 0.000   | 0.120    | 0.176  | 0.167    | 0.060  |
| 150   |        | 0.029   | 0.020    | 0.000  | 0.083    | 0.000  |
| 153   |        | 0.029   | 0.020    | 0.000  | 0.000    | 0.000  |
| 159   |        | 0.000   | 0.000    | 0.000  | 0.000    | 0.020  |
| 162   |        | 0.000   | 0.000    | 0.000  | 0.000    | 0.040  |
| 165   |        | 0.086   | 0.020    | 0.118  | 0.083    | 0.020  |
| 177   | 0.000  | 0.000   | 0.059    | 0.000  | 0.000    |        |
| 99    | 0.000  | 0.000   | 0.000    | 0.056  | 0.000    |        |
| TA87  | 102    | 0.000   | 0.000    | 0.000  | 0.028    | 0.000  |
|       | 105    | 0.000   | 0.000    | 0.000  | 0.028    | 0.000  |
|       | 108    | 0.029   | 0.000    | 0.059  | 0.000    | 0.020  |
|       | 111    | 0.086   | 0.040    | 0.059  | 0.056    | 0.040  |
|       | 114    | 0.400   | 0.280    | 0.294  | 0.250    | 0.420  |
|       | 117    | 0.229   | 0.140    | 0.059  | 0.167    | 0.220  |
|       | 120    | 0.057   | 0.140    | 0.118  | 0.194    | 0.080  |
|       | 123    | 0.057   | 0.280    | 0.235  | 0.083    | 0.120  |
|       | 126    | 0.057   | 0.040    | 0.118  | 0.083    | 0.080  |
|       | 129    | 0.086   | 0.040    | 0.000  | 0.083    | 0.020  |
|       | 132    | 0.000   | 0.020    | 0.000  | 0.028    | 0.000  |
|       | 135    | 0.000   | 0.020    | 0.059  | 0.000    | 0.000  |
| TA109 | 176    | 0.000   | 0.020    | 0.000  | 0.000    | 0.080  |
|       | 179    | 0.086   | 0.240    | 0.118  | 0.056    | 0.260  |
|       | 182    | 0.029   | 0.160    | 0.118  | 0.194    | 0.200  |
|       | 185    | 0.029   | 0.060    | 0.059  | 0.028    | 0.100  |
|       | 188    | 0.029   | 0.000    | 0.000  | 0.000    | 0.000  |
|       | 191    | 0.086   | 0.060    | 0.294  | 0.028    | 0.060  |
|       | 194    | 0.029   | 0.120    | 0.059  | 0.056    | 0.160  |
|       | 197    | 0.000   | 0.020    | 0.000  | 0.028    | 0.000  |
|       | 200    | 0.000   | 0.020    | 0.000  | 0.000    | 0.000  |
|       | 203    | 0.000   | 0.020    | 0.059  | 0.056    | 0.040  |
|       | 206    | 0.029   | 0.000    | 0.000  | 0.000    | 0.000  |
|       | 209    | 0.000   | 0.000    | 0.000  | 0.028    | 0.000  |
|       | 212    | 0.057   | 0.040    | 0.000  | 0.028    | 0.000  |
|       | 215    | 0.600   | 0.240    | 0.294  | 0.444    | 0.100  |
| 218   | 0.000  | 0.000   | 0.000    | 0.056  | 0.000    |        |
| 227   | 0.029  | 0.000   | 0.000    | 0.000  | 0.000    |        |
